# Supplementary material for: Characterisation of miRNA Expression in Dental Pulp Cells during Epigenetically-Driven Reparative Processes
Source: MDPI journal article supplement (doi:10.3390/ijms24108631), 2023-05-11
Supplement: s1 [file s1]

| Ind vs NInd     |                 |             |            |
|-----------------|-----------------|-------------|------------|
| miRNA           | <i>p</i> -value | Fold change | Regulation |
| rno-miR-770-3p  | 0.0495          | -5.3917     | down       |
| rno-miR-346     | 0.0463          | -5.0284     | down       |
| rno-miR-201-5p  | 0.0495          | 5           | up         |
| rno-miR-598-5p  | 0.0495          | -4.7671     | down       |
| rno-miR-375-3p  | 0.0495          | 4.5716      | up         |
| rno-miR-377-5p  | 0.0495          | -3.1195     | down       |
| rno-miR-3558-5p | 0.0495          | 3.0575      | up         |
| rno-miR-412-5p  | 0.0495          | -3.053      | down       |
| rno-miR-376a-3p | 0.0495          | -2.934      | down       |
| rno-miR-147     | 0.0495          | 2.8676      | up         |

**Table S1.** miRNAs with the largest fold change in expression in Ind compared with NInd at day 4 as determined by a Mann-Whitney U test. All data analysis carried out on three independent replicates. Fold change cut-off >1.5,  $p \leq 0.05$ .

| Ind+S vs NInd   |                 |             |            |
|-----------------|-----------------|-------------|------------|
| miRNA           | <i>q</i> -value | Fold change | Regulation |
| rno-miR-3553    | 0.0466          | 8.481       | up         |
| rno-miR-410-5p  | 0.0467          | 8           | up         |
| rno-miR-182     | 0.0466          | 3.6954      | up         |
| rno-miR-377-3p  | 0.0466          | 3.3264      | up         |
| rno-miR-1247-3p | 0.0466          | -3.2453     | down       |
| rno-miR-708-3p  | 0.0454          | -3.093      | down       |
| rno-miR-758-3p  | 0.0496          | 3.0928      | up         |
| rno-miR-10a-5p  | 0.0466          | 3.011       | up         |
| rno-miR-543-3p  | 0.0466          | 2.932       | up         |
| rno-miR-540-3p  | 0.0466          | 2.7322      | up         |

**Table S2.** miRNAs with the largest fold change in expression in Ind+S compared with NInd at day 4 as determined by a moderated t-test in combination with Storey's bootstrapping method. All data analysis carried out on three independent replicates. Fold change cut-off >1.5,  $q \leq 0.05$ .

| Ind+A vs NInd   |          |             |            |
|-----------------|----------|-------------|------------|
| miRNA           | q-value  | Fold change | Regulation |
| rno-miR-881-3p  | 5.56E-04 | 603.906     | up         |
| rno-miR-741-3p  | 2.53E-04 | 249.7982    | up         |
| rno-miR-871-3p  | 2.53E-04 | 213.5208    | up         |
| rno-miR-871-5p  | 0.001    | 199.2512    | up         |
| rno-miR-743b-3p | 0.001    | 194.4895    | up         |
| rno-miR-743a-3p | 2.53E-04 | 178.295     | up         |
| rno-miR-463-5p  | 0.001    | 161.3718    | up         |
| rno-miR-743b-5p | 4.06E-04 | 98.8655     | up         |
| rno-miR-3580-3p | 0.002    | 51.3771     | up         |
| rno-miR-471-5p  | 2.53E-04 | 36.765      | up         |

**Table S3.** miRNAs with the largest fold change in expression in Ind+A compared with NInd at day 4 as determined by moderated t-test in combination with Storey's bootstrapping. All data analysis carried out on three independent replicates. Fold change cut-off >1.5,  $q \leq 0.05$ .

| Ind+S vs Ind   |         |             |            |
|----------------|---------|-------------|------------|
| miRNA          | q-value | Fold change | Regulation |
| rno-miR-346    | 0.0144  | 9.0318      | up         |
| rno-miR-3553   | 0.0231  | 7.1433      | up         |
| rno-miR-412-5p | 0.0231  | 7.0871      | up         |
| rno-miR-410-5p | 0.0329  | 6.8276      | up         |
| rno-miR-377-5p | 0.0326  | 6.2164      | up         |
| rno-miR-183-5p | 0.0311  | 5.6106      | up         |
| rno-miR-770-3p | 0.0276  | 5.4077      | up         |
| rno-miR-377-3p | 0.0156  | 4.9179      | up         |
| rno-miR-6331   | 0.0184  | 4.6497      | up         |
| rno-miR-667-5p | 0.0215  | 4.5881      | up         |

**Table S4.** miRNAs with the largest fold change in expression in Ind+S compared with Ind at day 4 as determined by moderated t-test in combination with Storey's bootstrapping. All data analysis carried out on three independent replicates. Fold change cut-off >1.5,  $q \leq 0.05$ .

| Ind+A vs Ind    |                 |             |            |
|-----------------|-----------------|-------------|------------|
| miRNA           | <i>q</i> -value | Fold change | Regulation |
| rno-miR-881-3p  | 0.0066          | 273.9668    | up         |
| rno-miR-743b-3p | 0.002           | 240.7617    | up         |
| rno-miR-871-3p  | 0.003           | 214.3537    | up         |
| rno-miR-743a-3p | 1.94E-04        | 191.8932    | up         |
| rno-miR-463-5p  | 0.0015          | 175.1376    | up         |
| rno-miR-741-3p  | 0.0015          | 172.5662    | up         |
| rno-miR-871-5p  | 0.003           | 153.8468    | up         |
| rno-miR-743b-5p | 0.001           | 86.0507     | up         |
| rno-miR-3580-3p | 0.0023          | 51.3771     | up         |
| rno-miR-471-5p  | 1.94E-04        | 36.765      | up         |

**Table S5.** miRNAs with the largest fold change in expression in Ind+A compared with Ind at day 4 as determined by moderated t-test in combination with Storey's bootstrapping. All data analysis carried out on three independent replicates. Fold change cut-off >1.5,  $p \leq 0.05$ .

| miRNA                  | Fold change   |               |              |              | Notes/reason for selection                                                                                                                                                                                     | Reference                                  | % Sequence similarity with human ortholog |
|------------------------|---------------|---------------|--------------|--------------|----------------------------------------------------------------------------------------------------------------------------------------------------------------------------------------------------------------|--------------------------------------------|-------------------------------------------|
|                        | Ind+S vs NInd | Ind+A vs NInd | Ind+S vs Ind | Ind+A vs Ind |                                                                                                                                                                                                                |                                            |                                           |
| <b>rno-miR-200b-3p</b> | -             | 2.598         | -            | 1.559        | Differentially regulated in Ind+A compared with NInd and Ind<br><br>Controlled by DNMT3A                                                                                                                       | Zhao et al., 2018                          | 95.70                                     |
| <b>rno-miR-205</b>     | -2.06         | 3.11          | -            | 3.98         | Inhibition of miR-205 enhances osteogenic abilities by upregulating <i>Bsp</i> and <i>Opn</i><br><br>Is one of many <i>Runx2</i> -targeting miRNAs suggested to be involved in osteogenesis and chondrogenesis | Hu et al., 2015<br><br>Zhang, et al., 2011 | 95.6%                                     |
| <b>rno-miR-221-5p*</b> | 1.732         | 1.667         | -            | -            | Differentially regulated in two of three groups<br><br>Inhibition of microRNA-221-5p induces osteogenic differentiation of BMMSCs via upregulation of <i>SMAD3</i>                                             | Fan et al., 2019                           | 95.70                                     |

| miRNA                 | Fold change   |               |              |              | Notes/reason for selection                                                                                                               | Reference        | % Sequence similarity with human ortholog |
|-----------------------|---------------|---------------|--------------|--------------|------------------------------------------------------------------------------------------------------------------------------------------|------------------|-------------------------------------------|
|                       | Ind+S vs NInd | Ind+A vs NInd | Ind+S vs Ind | Ind+A vs Ind |                                                                                                                                          |                  |                                           |
| <b>rno-miR-182</b>    | 3.695         | 2.056         | 2.907        | -            | Downregulated miR-182-5p promotes the proliferation and differentiation of osteoblasts in osteoporotic rats through Rap1-MAPK signalling | Pan et al., 2018 | 92                                        |
| <b>rno-miR-346</b>    | -             | -             | 9.032        | -            | Highest differentially regulated in Ind+S vs Ind                                                                                         |                  | 87                                        |
| <b>rno-miR-881-3p</b> | -             | 603.91        | -            | 273.97       | Highest differentially regulated in Ind+A vs Ind                                                                                         |                  | N/A                                       |

**Table S6.** Six miRNAs chosen for validation using qRT-PCR. The fold change of each miRNA in each of the 5 experimental pairings as determined by A moderated t-test combined with Storey's bootstrapping method is shown, as well as the percentage sequence identity each miRNA shares with its human ortholog. rno-miR-881-3p does not have a known human ortholog. miR-221-5p was not found to be differentially regulated in any experimental group when using the moderated t-test, however the less stringent Mann-Whitney U test determined it to be differentially expression in Ind+S and Ind+A compared with Ind.
